# Supplementary material
Source: PubMed Central journal article supplement (PMC8972808)
Supplement: NIHMS1771140-supplement-1.pdf [file NIHMS1771140-supplement-1.pdf]

**Figure S1**

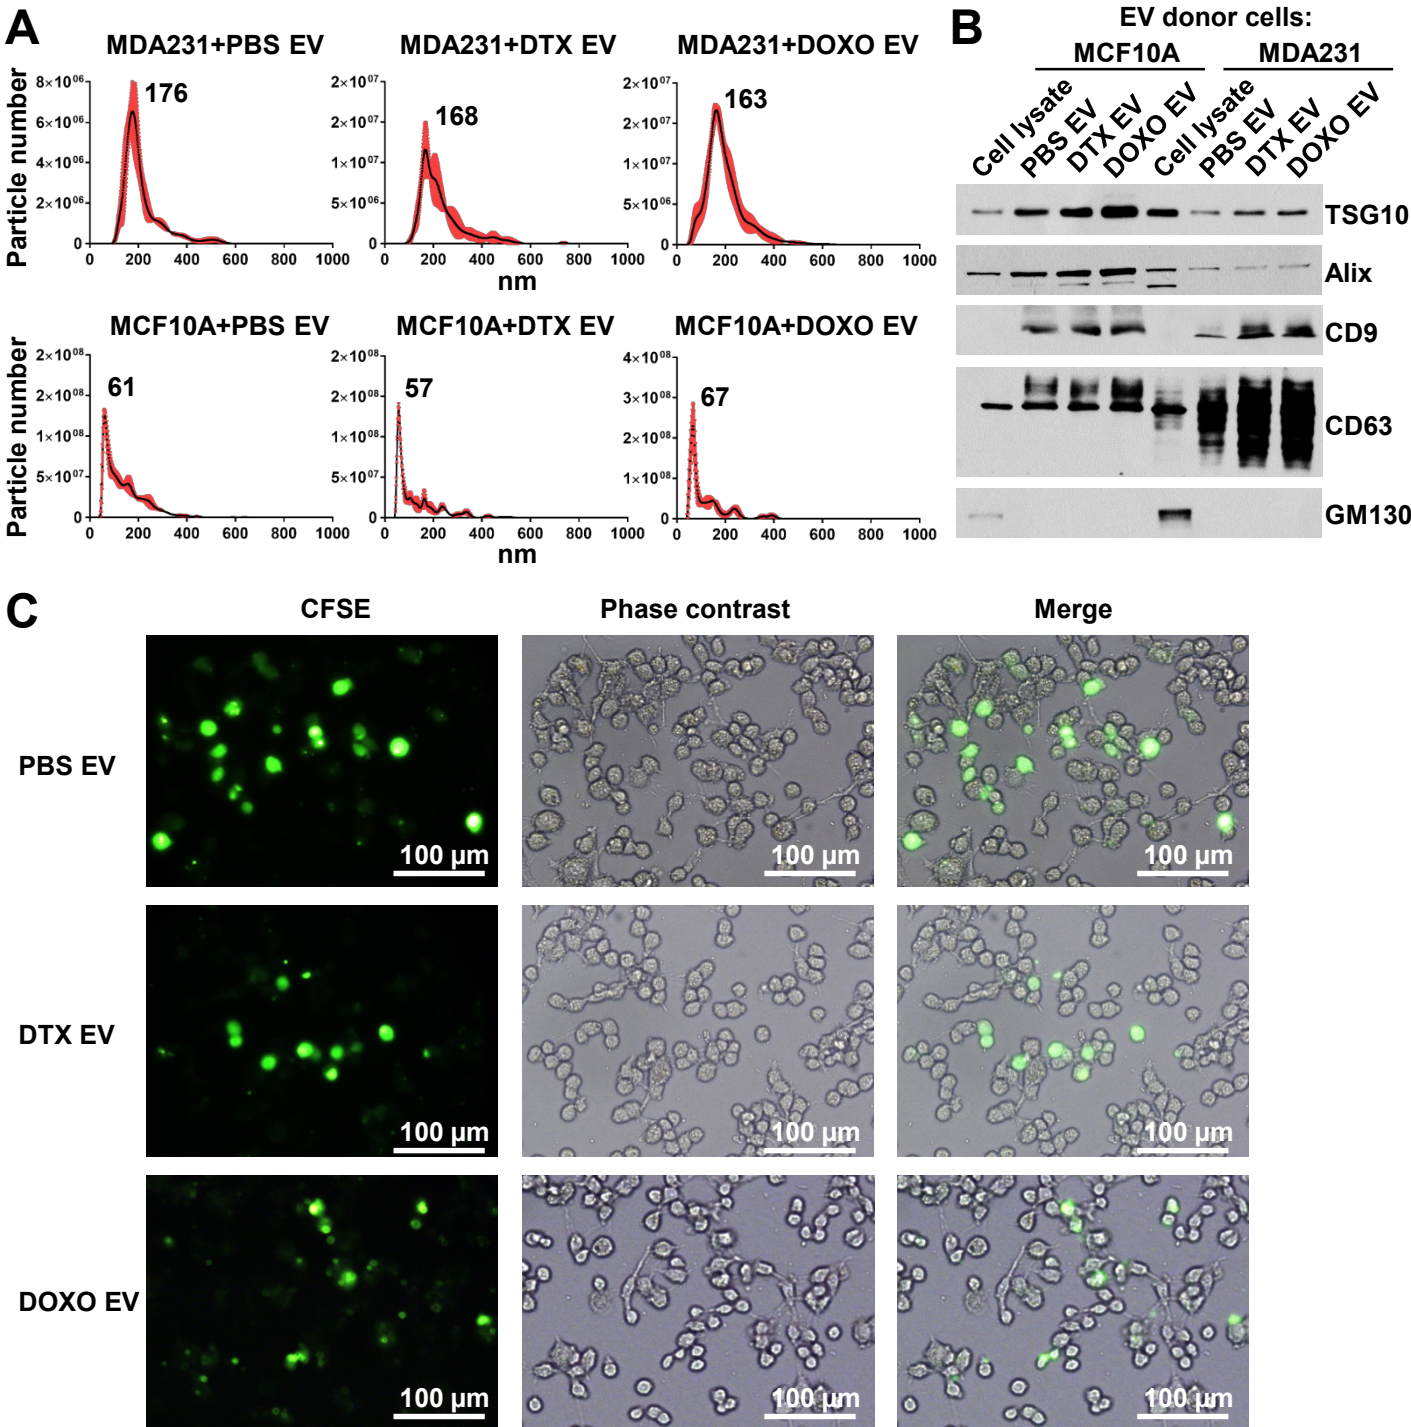

**Fig. S1. Characterization of EVs and EV uptake by recipient cells.** (A) EVs pelleted at 110,000  $\times$ g were analyzed by nanoparticle tracking analysis. The black line indicates the mean, whereas the red shaded area indicates the standard error of the mean. (B) Western blot analysis indicating the presence of EV markers and absence of a Golgi marker, GM130, in prepared EVs. (C) Indicated EVs from MDA231 cells were labeled with CFSE and then used to treat MDA231 cells seeded in a chamber slide. After 24 h, cells were imaged under a fluorescent microscope. Scale bar = 100  $\mu$ m.
