# Supplementary material
Source: PubMed Central journal article supplement (PMC8972808)
Supplement: NIHMS1771140-supplement-2.pdf [file NIHMS1771140-supplement-2.pdf]

# Figure S2

**A**

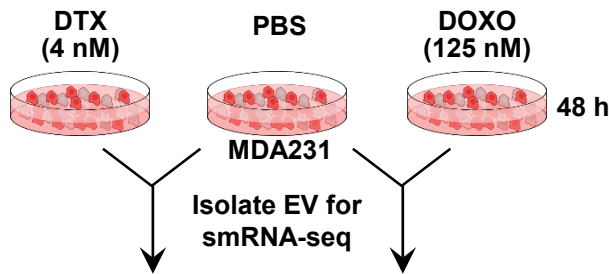

EV miRNAs induced by DTX (>2-fold); normalized counts >40 in ≥1 sample

EV miRNAs induced by DOXO (>2-fold); normalized counts >40 in ≥1 sample

35 miRNAs identified

26 miRNAs identified

EV miRNAs induced by both drugs ("chemo-EV miRNAs")

19 miRNAs

Select miRNAs broadly conserved across most vertebrates

6 miRNAs:

hsa-miR-9-5p  
 hsa-miR-203a-3p  
 hsa-miR-195-5p

hsa-miR-135b-5p (not selected – no effect on sphere formation)

hsa-let-7e-5p (not selected – multiple family members sharing the same seed sequence; very high endogenous expression so unlikely to be affected by EV transfer)

Common target genes of miR-9/miR-203/miR-195 (predicted by miRDB)

hsa-let-7b-5p

**B**

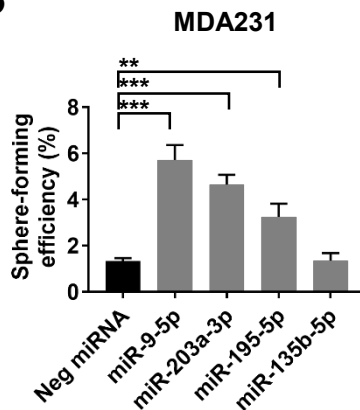

**Fig. S2. Strategy to select chemo-EV miRNAs for functional investigation.** (A) A schematic representative showing the experimental design and criteria used to select the 3 miRNAs. (B) MDA231 cells were transfected with indicated miRNA mimics or a negative control mimic. After 48 h, cells were collected for sphere formation assay. \*\*P<0.01, \*\*\*P<0.001.
