# Supplementary material
Source: PubMed Central journal article supplement (PMC8972808)
Supplement: NIHMS1771140-supplement-3.pdf [file NIHMS1771140-supplement-3.pdf]

**Figure S3**

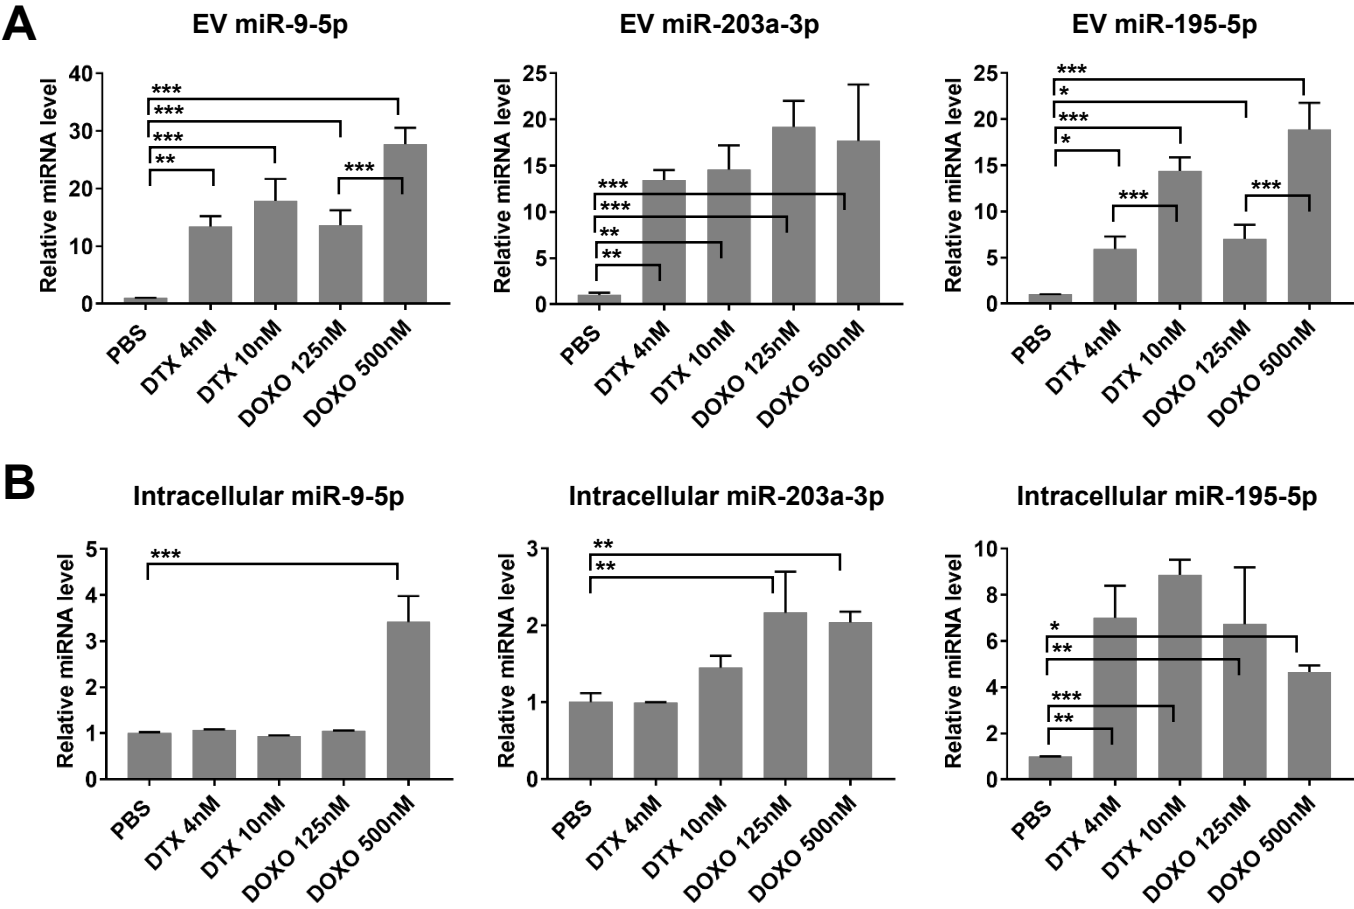

**Fig. S3. Dose-dependent regulation of selected miRNAs by chemotherapy.** Total RNA was extracted from an equal amount of EVs (A) or cell lysates (B) of PBS- or chemotherapy-treated MDA231 cells. RT-qPCR was performed to determine levels of miR-9-5p, miR-203a-3p, and miR-195-5p using a cel-miR-39-3p spike-in control (for EV miRNA levels) or U6 internal control (for intracellular miRNA levels) for normalization. \*P<0.05, \*\*P<0.01, \*\*\*P<0.001.
