# Supplementary material
Source: PubMed Central journal article supplement (PMC8972808)
Supplement: NIHMS1771140-supplement-4.pdf [file NIHMS1771140-supplement-4.pdf]

**Figure S4**

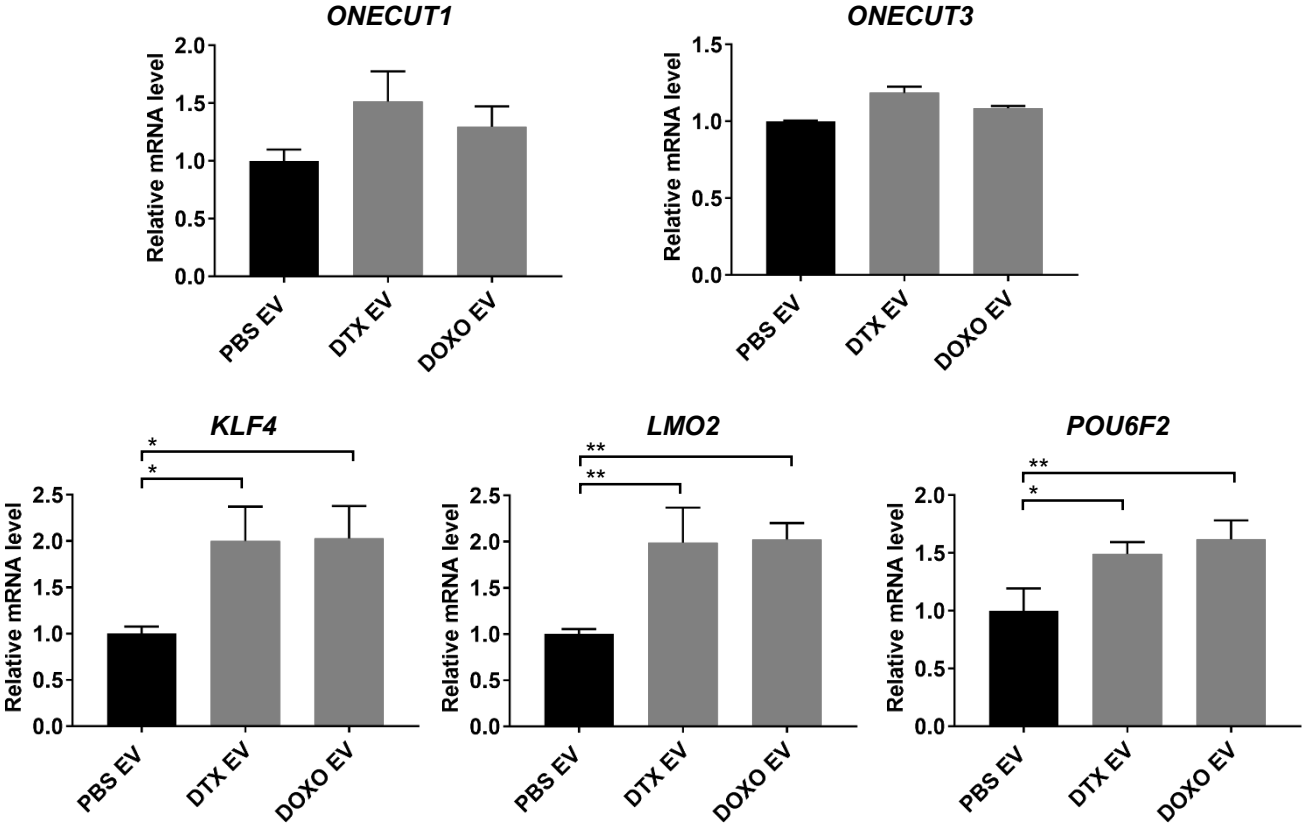

**Fig. S4. Effect of chemo-EVs on other ONECUT family members and ONECUT2 target genes.** MDA231 cells were treated with an equal amount of EVs from MDA231 cells that had been exposed to PBS, DTX (4 nM), or DOXO (125 nM) for 48 h before EV collection. EV-treated MDA231 cells were analyzed at 48 h by RT-qPCR for levels of indicated genes using 18S rRNA level for normalization. \*P<0.05, \*\*P<0.01.
