# Supplementary material
Source: PubMed Central journal article supplement (PMC8972808)
Supplement: NIHMS1771140-supplement-5.pdf [file NIHMS1771140-supplement-5.pdf]

Figure S5

MDA231

A

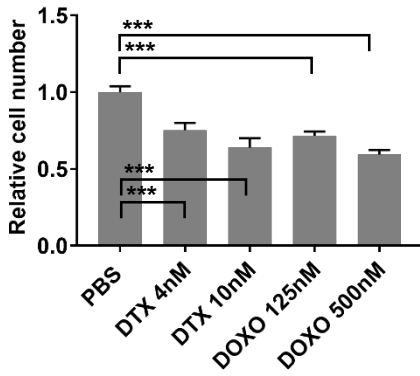

B

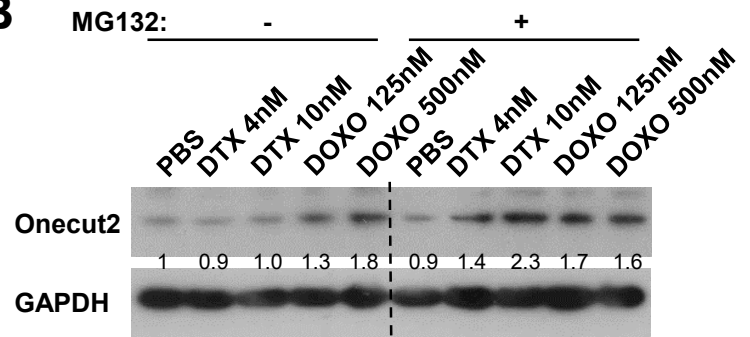

C

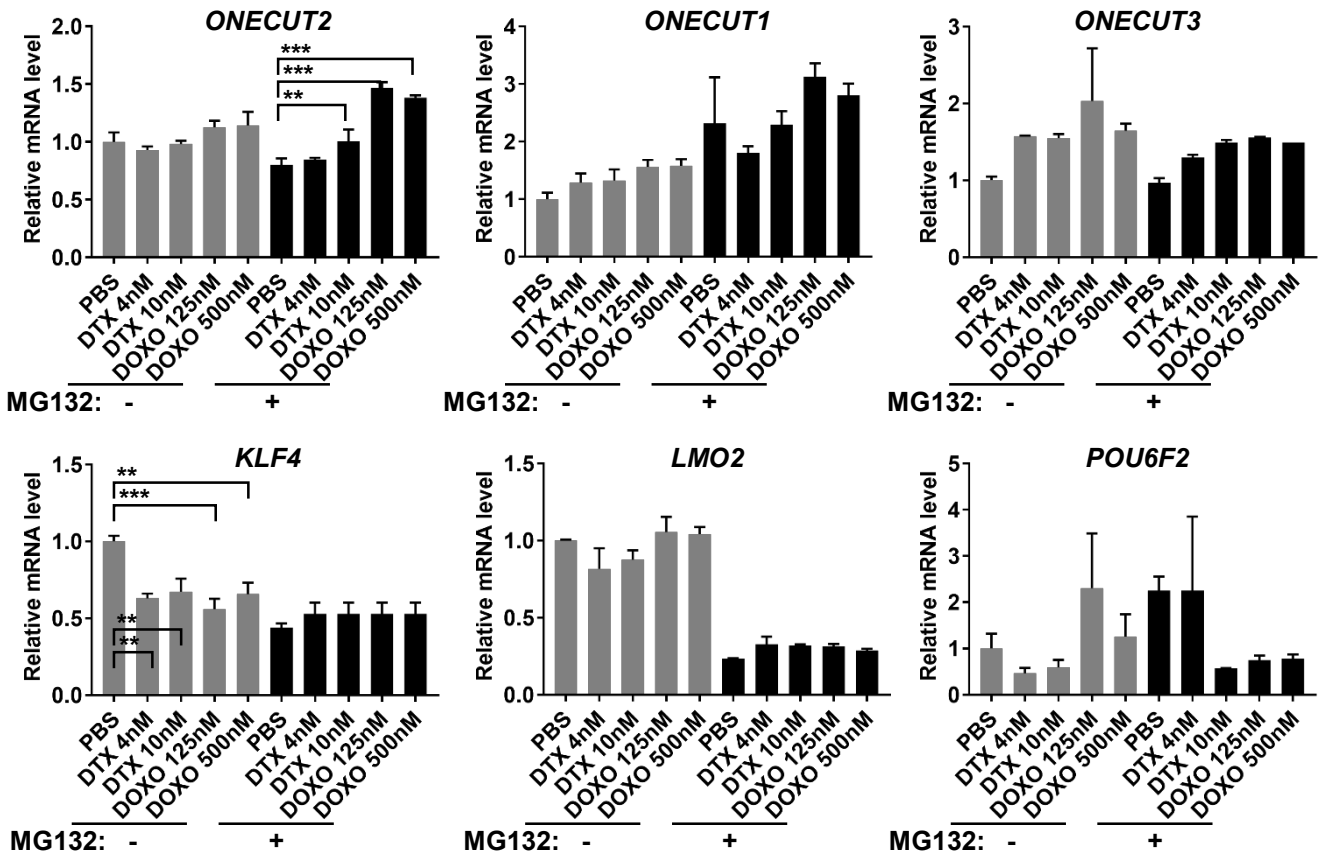

Figure S5 (continued)

MCF-7

D

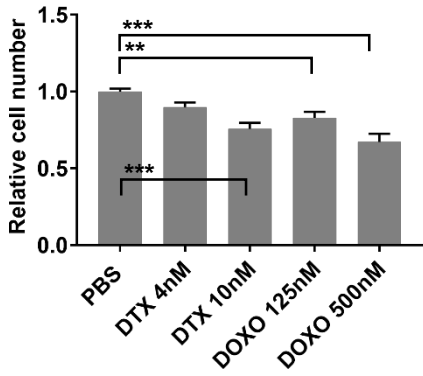

E

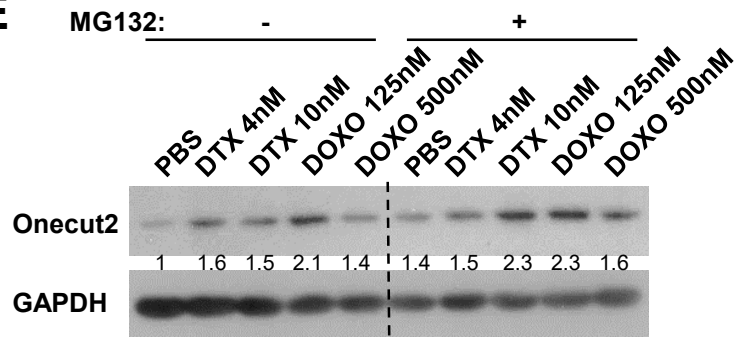

F

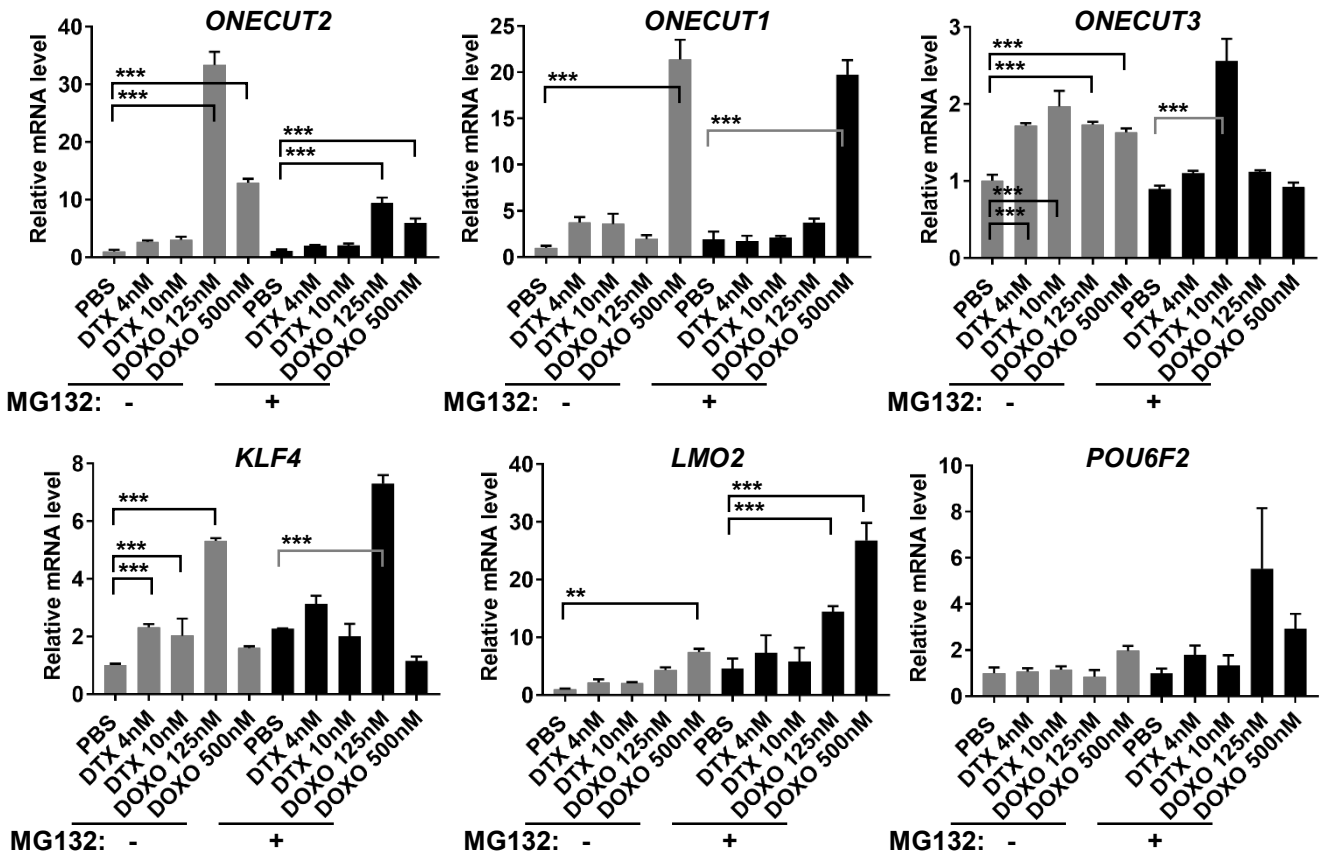

Figure S5 (continued)

BT474

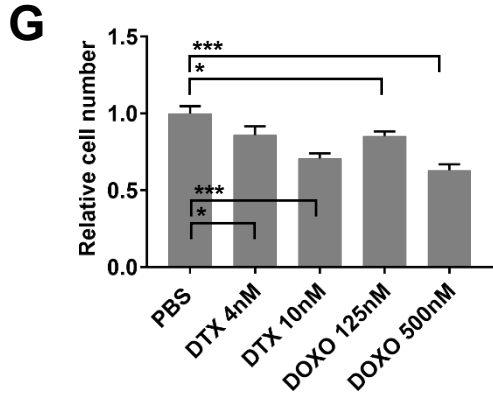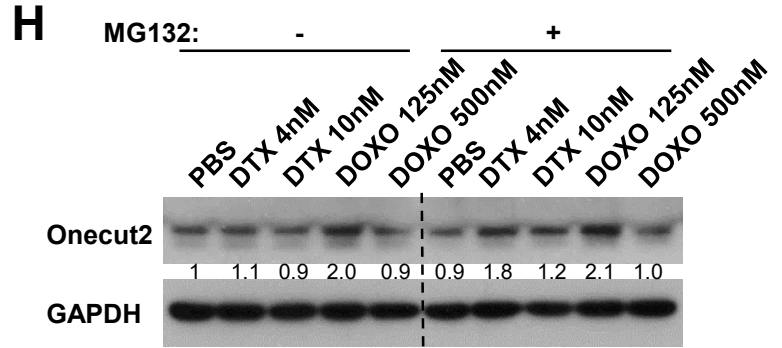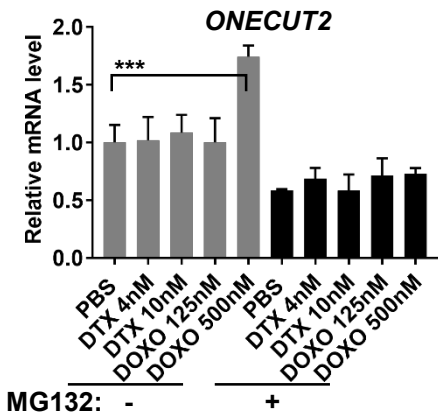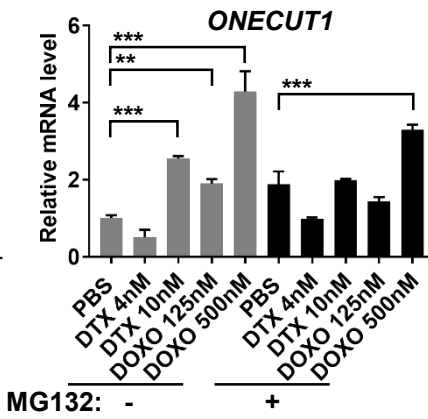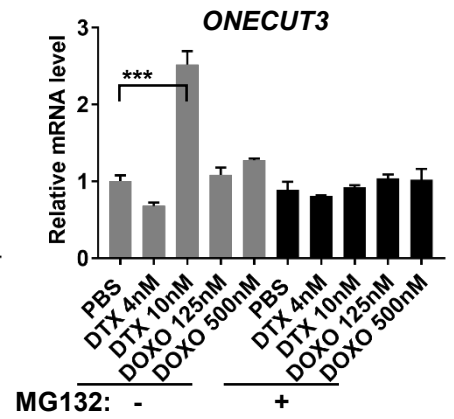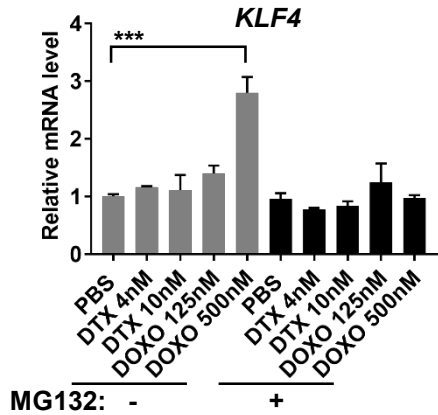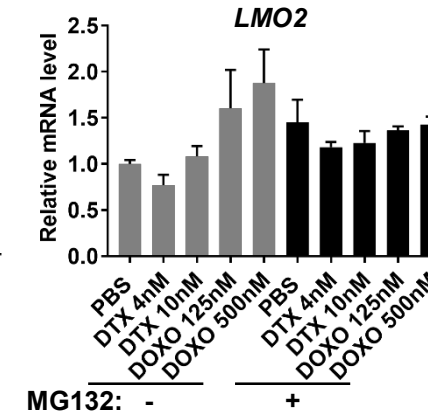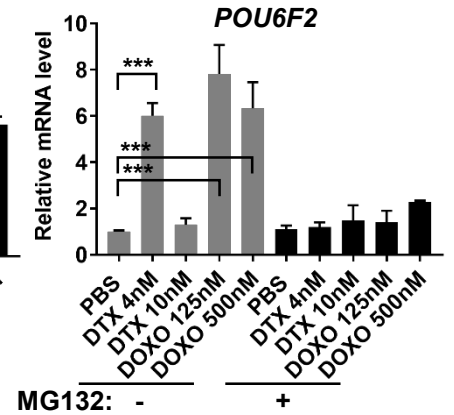

**Figure S5 (continued)**

**MCF10A**

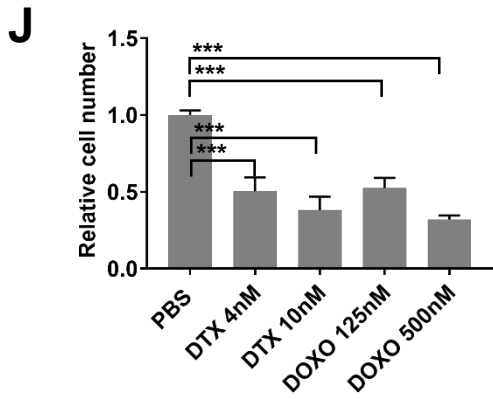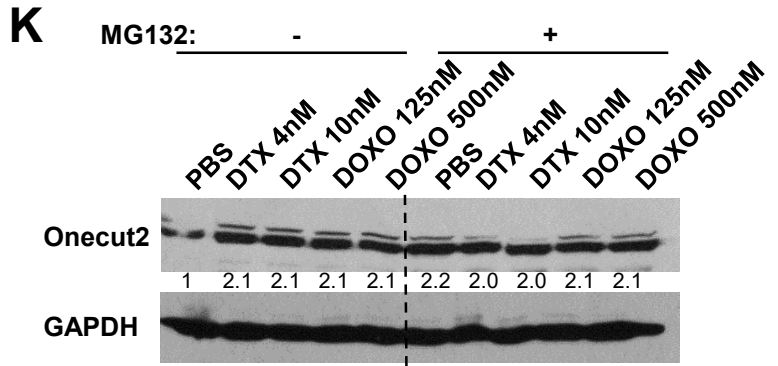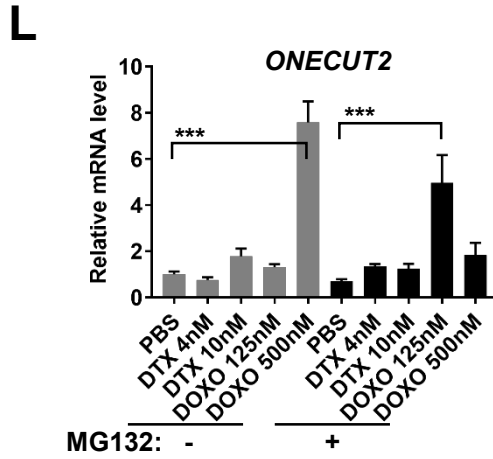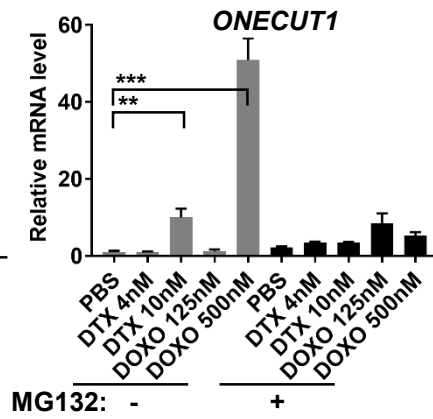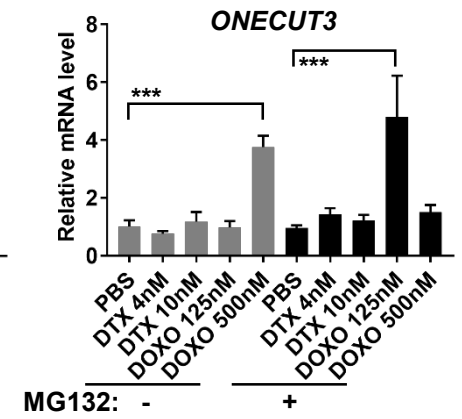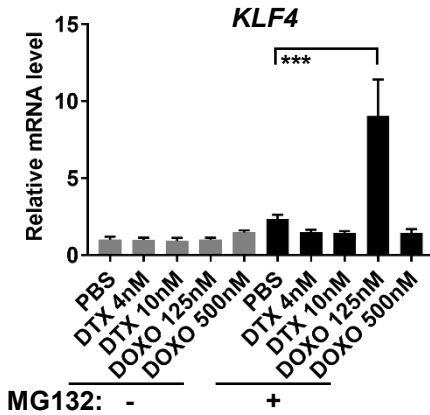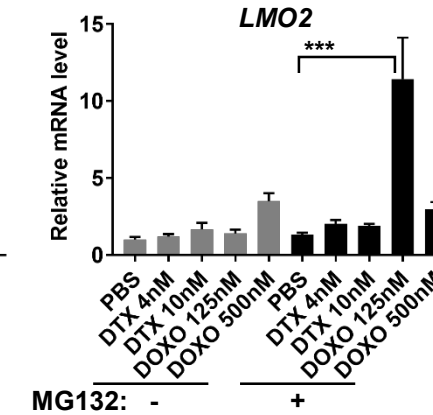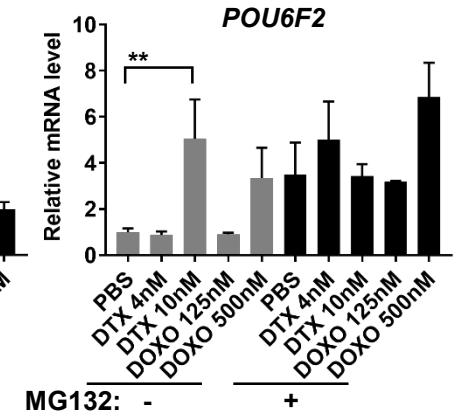

**Fig. S5. Direct effect of chemotherapy on cell lines used in this study.** MDA231 (A-C), MCF-7 (D-F), BT474 (G-I), and MCF10A (J-L) cells were treated with DTX or DOXO at indicated concentrations or with PBS. (A,D,G,J) Cell numbers were determined after 48 h. (B,E,H,K) After 24 h of chemotherapy treatment, MG132 (10  $\mu$ M) or PBS was added to cells for 6 h before Western blot analysis. (C,F,I,L) RT-qPCR analysis of cells treated as in (B,E,H,K) using 18S rRNA level for normalization. \* $P < 0.05$ , \*\* $P < 0.01$ , \*\*\* $P < 0.001$ . Numbers below Western images indicate quantification after normalization to GAPDH with the first lane set as 1.
